# Supplementary material for: Differences and Commonalities in Children with Childhood Apraxia of Speech and Comorbid Neurodevelopmental Disorders: A Multidimensional Perspective
Source: MDPI journal article supplement (doi:10.3390/jpm12020313), 2022-02-19
Supplement: s1 [file s1]

**Supplementary Table S2. Speech and language assessment procedures.**

|                                          | <i>Procedure</i>                                    |                                                                                                                                                                                                                                                                                   | <b>Reference data</b>                                     | <b>Scoring</b>                                                                                                      |
|------------------------------------------|-----------------------------------------------------|-----------------------------------------------------------------------------------------------------------------------------------------------------------------------------------------------------------------------------------------------------------------------------------|-----------------------------------------------------------|---------------------------------------------------------------------------------------------------------------------|
|                                          | <i>Parental report</i>                              | Family history, child's pre-, peri- and post-natal clinically significant events, early vocal behavior and language milestones acquisition. Intelligibility of speech to familiar and unfamiliar adults (modified version of the questionnaire reported by Chilosi et al., 2009). |                                                           |                                                                                                                     |
| <b>Speech Composite Severity Score</b>   | <i>Phonetic inventory</i>                           | Repetition of 21 syllables containing all the Italian consonantal sounds.                                                                                                                                                                                                         | 40 TD children, mean age=4.7 yrs (SD= 0.47 yrs)           | Mean number of phonemes: 19.2 (SD=0.9)                                                                              |
|                                          | <i>Word Inaccuracy</i>                              | 46 probe words picture naming test (Chilosi & Podda, in preparation);                                                                                                                                                                                                             | 40 TD children, mean age=4.7 yrs (SD= 0.47 yrs)           | Mean percentage of inaccurate productions: 8.8% (SD=10.7).                                                          |
|                                          | <i>Inconsistent errors on consonants and vowels</i> | Same task as for inaccuracy. Scoring based on the percentage of variable phonetic errors on two repeated productions of the same word.                                                                                                                                            | 40 TD children mean age=4.7 (SD=0.47 yrs)                 | Mean percentage of inconsistent errors: 0.4% (SD= 1.3)                                                              |
|                                          | <i>Syllable omissions</i>                           | Same task as for inaccuracy. Scoring based on the percentage of omitted syllables in words.                                                                                                                                                                                       | 40 TD children mean age=4.7 (SD=0.47 yrs)                 | Mean percentage of omitted syllables: 0%                                                                            |
|                                          | <i>DDK rate (maximum performance task)</i>          | Fast repetition of the trisyllabic non-word sequence /pataka/, scored as the number of repeated /pataka/ in 20 sec.                                                                                                                                                               | 40 TD children (mean age=4.7 yrs (SD=0.9 yrs)             | Mean number of repetitions: 23.18 (SD=4.5);                                                                         |
|                                          | <i>Intelligibility</i>                              | Intelligibility in Context Scale (McLeod et al., 2012, Italian version).<br><br>Parental report on the child's intelligibility in different communicative contexts.                                                                                                               |                                                           | Qualitative rating scale ranging from 5 to 1 (5=always, 4= usually, 3= sometimes, 2= rarely, 1= never intelligible) |
| <b>Language Composite Severity Score</b> | <i>Expressive grammar</i>                           | Grid for the Analysis of Spontaneous Speech (GASS) Chilosi et al (2013)                                                                                                                                                                                                           | Longitudinal sample: 6 TD children video recorded twice a | 12-18 months: Preverbal/Holophrastic level.<br>19-25 months: Presyntactic level, emergence of two- and three-word   |

|                              |                                                                                                                                                                        |                                                                                 |                                                                                                                                                                                         |
|------------------------------|------------------------------------------------------------------------------------------------------------------------------------------------------------------------|---------------------------------------------------------------------------------|-----------------------------------------------------------------------------------------------------------------------------------------------------------------------------------------|
|                              |                                                                                                                                                                        | month from 19 to 36 months (Cipriani et al., 1993)                              | combinations.<br><br>20–26 months: Telegraphic level, emergence of morphosyntactically incomplete subject–verb-object structures                                                        |
|                              |                                                                                                                                                                        | Cross-sectional sample: 50 t.d. children aged 26-44 mths (Chilosi et al., 2013) | 24–31 months: Grammatical stage 1, full control of morphology in simple sentences<br><br>28–36 months: Grammatical stage 2, production of well-formed both simple and complex sentences |
| <i>Receptive grammar</i>     | TCGB, Test di Comprensione Grammaticale per Bambini (Grammar comprehension test for children) (Chilosi & Cipriani, 2005)                                               | 280 ss; age from 3.6 to 8 yrs                                                   | Standard scores                                                                                                                                                                         |
|                              | TROG-2 Test for Reception of Grammar–Version 2. Dorothy VM Bishop (Italian Version: Suraniti, Ferri & Neri, 2009)                                                      | 1276 ss (51% F, 49% M); age from 4 to 87 yrs                                    | Standard scores                                                                                                                                                                         |
| <i>Receptive vocabulary</i>  | Test Fonolessicale-TFL (Vicari et al., 2007) and/or                                                                                                                    | TFL: 240 Italian children from 2.6 to 6 yrs                                     | Percentile scores                                                                                                                                                                       |
|                              | Peabody Picture Vocabulary Test (PPVT-R - Dunn & Dunn, 1997; Italian version - Stella et al., 2000), depending on the child's age and on the severity of the disorder. | PPVT: 2400 Italian children from 3.9 to 11.6 yrs                                | Standard scores                                                                                                                                                                         |
| <i>Expressive vocabulary</i> | Test Fonolessicale-TFL (Vicari et al., 2007) and/or                                                                                                                    | TFL: 268 Italian children from 3 to 6 yrs                                       | Percentile scores                                                                                                                                                                       |
|                              | One-Word Picture Vocabulary Test (Brizzolara, 1989), depending on the child's age and on the severity of the disorder.                                                 | One –Word Picture Vocabulary test: 154 children from 4.6 to 10.8 yrs            | Separate z-scores for high (52 items) and low (52 items) frequency words.                                                                                                               |

Abbreviations: TD: Typically Developing; DDK: Diadochokinetic
