# Supplementary material for: Differences and Commonalities in Children with Childhood Apraxia of Speech and Comorbid Neurodevelopmental Disorders: A Multidimensional Perspective
Source: MDPI journal article supplement (doi:10.3390/jpm12020313), 2022-02-19
Supplement: s1 [file s1]

Supplementary Table S3. List of non causative CNVs (N-CNV) in reference to CAS detected in the sample.

| Index case           | assembly | band    | 5'-breakpoint | 3'-breakpoint | Lenght (bp) | Dup/Del | Parental origin | Genes in the region*                                           |
|----------------------|----------|---------|---------------|---------------|-------------|---------|-----------------|----------------------------------------------------------------|
| <b>Case 29</b>       | hg19     | Yp11.2  | 7241462       | 8028897       | 787435      | Dup     | Father          | <i>PRKY, TTTY12, TTTY16</i>                                    |
| <b>Case 30, 31**</b> | hg19     | Xq21.1  | 77456789      | 77912844      | 456055      | Dup     | Mother          | <i>CYSLTR1, ZCCHC5/RTL3</i>                                    |
| <b>Case 32</b>       | hg19     | 15q26.1 | 89349006      | 89802278      | 453272      | Dup     | Father          | <i>ACAN, HAPLN3, MFGE8, ABHD2, RLBPI, FANCI</i>                |
| <b>Case 33</b>       | hg19     | 5p13.3  | 33120288      | 33282513      | 162225      | Del     | Adopted         | <i>LINC02160</i>                                               |
|                      | hg19     | Yq11.22 | 24361332      | 24874501      | 513169      | Del     | Adopted         | <i>TTY5, RBMY2FP, RBMY1F, RBMY1J, PRY, LOC101929148, TTTY6</i> |
| <b>Case 34</b>       | hg19     | 4q28.1  | 127722226     | 127994826     | 272600      | Del     | Father          | none                                                           |
| <b>Case 35</b>       | hg19     | 13q34   | 114490012     | 114581677     | 91665       | Del     | n.a.            | <i>TMEM255B, GAS6, GAS6-AS1, GAS6-AS2, LINC00454</i>           |
| <b>Case 36</b>       | hg19     | 9q33.1  | 118997913     | 119111534     | 113621      | Dup     | Mother          | <i>PAPPA</i>                                                   |
| <b>Case 37</b>       | hg19     | 7q21.3  | 93355870      | 93516838      | 160968      | Del     | Father          | <i>TFPI2</i>                                                   |
|                      | hg19     | 10q26.2 | 129846011     | 129977860     | 131849      | Dup     | Mother          | <i>PTPRE, AS-PTPRE, MKI67</i>                                  |
| <b>Case 38</b>       | hg19     | 14q31.3 | 87997862      | 88365750      | 367888      | Del     | Father          | <i>LINC02330</i>                                               |
| <b>Case 39</b>       | hg19     | 3p21.31 | 44997133      | 45313328      | 316195      | Dup     | Mother          | <i>ZDHHC3, EXOSC7, CLEC3B, CDCPI, TMEM158</i>                  |
| <b>Case 40</b>       | hg19     | 7q31.1  | 109574852     | 109643998     | 69146       | Del     | Mother          | <i>EIF3IP1</i>                                                 |
| <b>Case 41</b>       | hg19     | 5p13.3  | 31484812      | 31681361      | 196549      | Dup     | Mother          | <i>DROSHA, C5ORF22, PDZD2</i>                                  |

Legend: Dup/Del, duplication/deletion; n.a., not available; \*, genes expressed in the brain; \*\*, siblings (discordant phenotype)
