# Supplementary material for: Differences and Commonalities in Children with Childhood Apraxia of Speech and Comorbid Neurodevelopmental Disorders: A Multidimensional Perspective
Source: MDPI journal article supplement (doi:10.3390/jpm12020313), 2022-02-19
Supplement: s1 [file s1]

**Supplementary Table S1: Speech features of Childhood Apraxia of Speech (CAS) according to the American Speech-Language-Hearing Association (ASHA) consensus and to Strand's 10-point checklist.**

|                                    |                                                                                                                                                                                                                                                                                                                                                                                                                                                                                                                                                                        |
|------------------------------------|------------------------------------------------------------------------------------------------------------------------------------------------------------------------------------------------------------------------------------------------------------------------------------------------------------------------------------------------------------------------------------------------------------------------------------------------------------------------------------------------------------------------------------------------------------------------|
| <b>ASHA:<br/>3 speech features</b> | <ol style="list-style-type: none"> <li>1) Inconsistent errors on consonants and vowels in repeated productions of syllables or words.</li> <li>2) Lengthened and disrupted co-articulatory transitions between sounds and syllables.</li> <li>3) Inappropriate prosody, especially in the realization of lexical or phrasal stress.</li> </ol>                                                                                                                                                                                                                         |
| <b>Strand's 10-point checklist</b> | <ol style="list-style-type: none"> <li>1) Vowel or consonant errors including distorted substitutions.</li> <li>2) Intrusive schwa.</li> <li>3) Voicing errors.</li> <li>4) Lexical stress errors or equal stress.</li> <li>5) Syllable segregation.</li> <li>6) Slow rate.</li> <li>7) Difficulty achieving initial articulatory configurations and transitions into vowels.</li> <li>8) Slow DDK rate.</li> <li>9) Groping (articulatory searching prior to phonating).</li> <li>10) Increased difficulty with longer or more phonetically complex words.</li> </ol> |
